# Supplementary material
Source: MDPI journal article supplement (https://www.mdpi.com/2073-4441/13/14/1906)
Supplement: s1 [file s1]

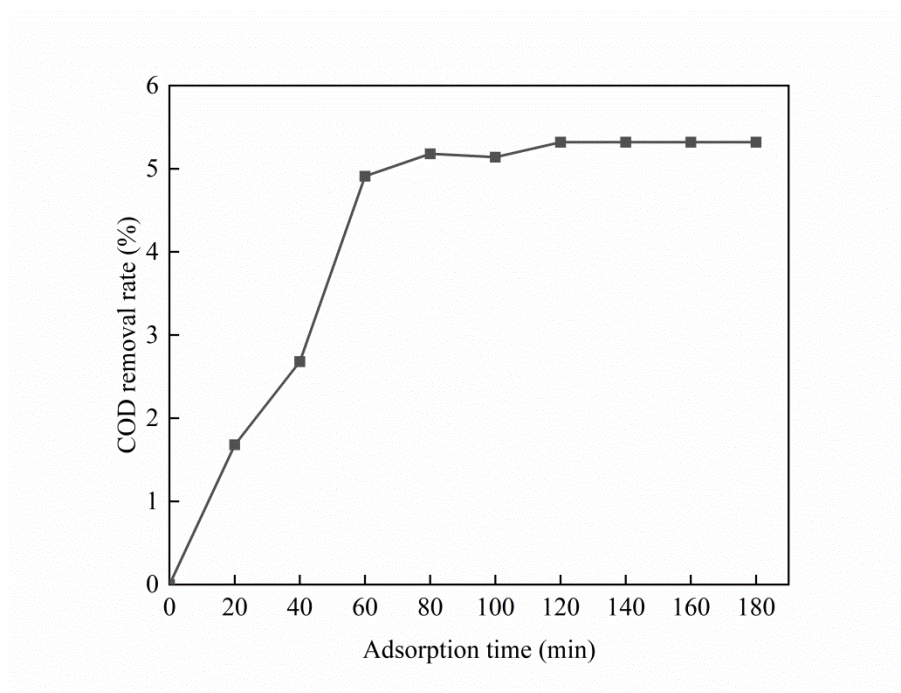

Figure S1 Adsorption experiment of of PTA biochemical tail water by artificial zeolite

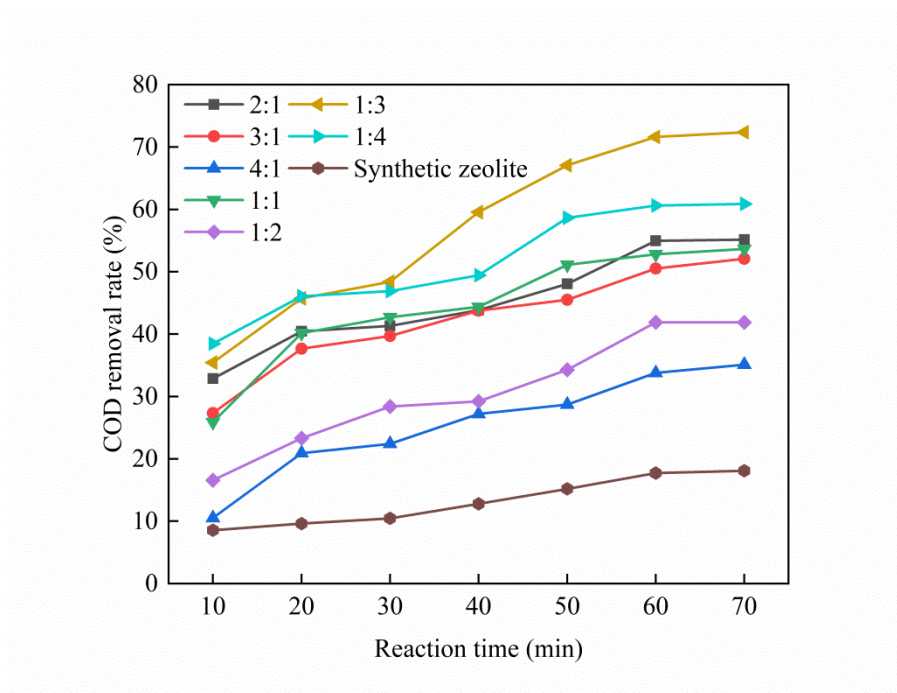

Figure S2 The effect of element impregnation ratio on the oxidation efficiency of PTA biochemical tail water (roasting temperature 300 °C, roasting time 3 h, pH = 8.5, reaction time 70 min, catalyst dosage 75 g /L, ozone generation 1.5 g / h, aeration 0.05 L / min)

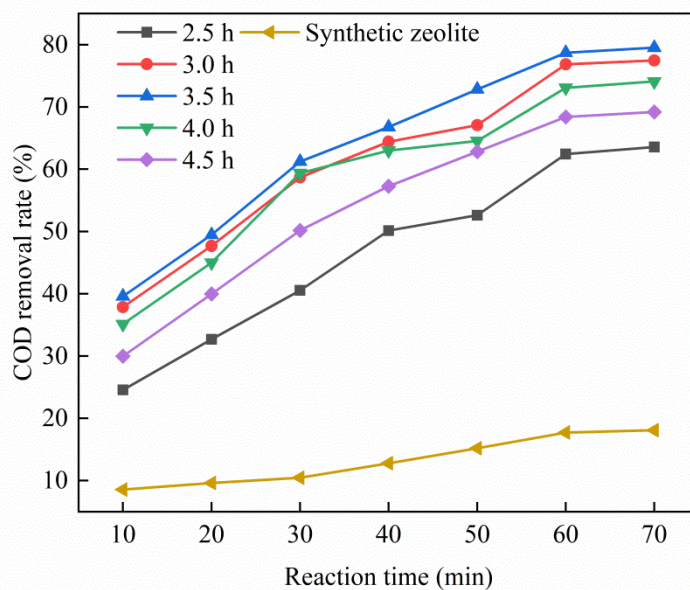

Figure S3 The effect of roasting temperature on the oxidation efficiency of PTA biochemical tail water (impregnation ratio of Cu: Ce = 1:3, calcination time 3.0 h, pH = 8.5, reaction time 70 min, catalyst dosage 75 g /L, ozone generation 1.5 g / h, aeration 0.05 L / min)

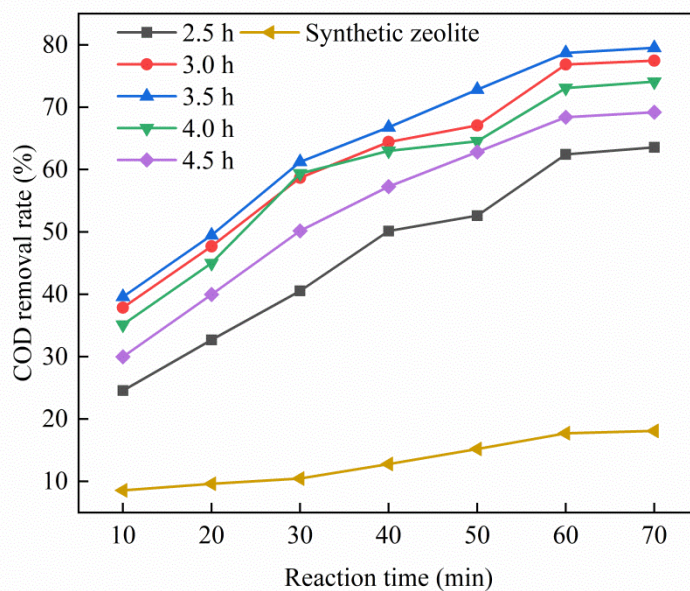

Figure S4 The effect of roasting time on the oxidation efficiency of PTA biochemical tail water (impregnation ratio of Cu: Ce = 1:3, calcination temperature 400 °C, pH = 8.5, reaction time 70 min, catalyst dosage 75 g /L, ozone generation 1.5 g / h, aeration 0.05 L / min)

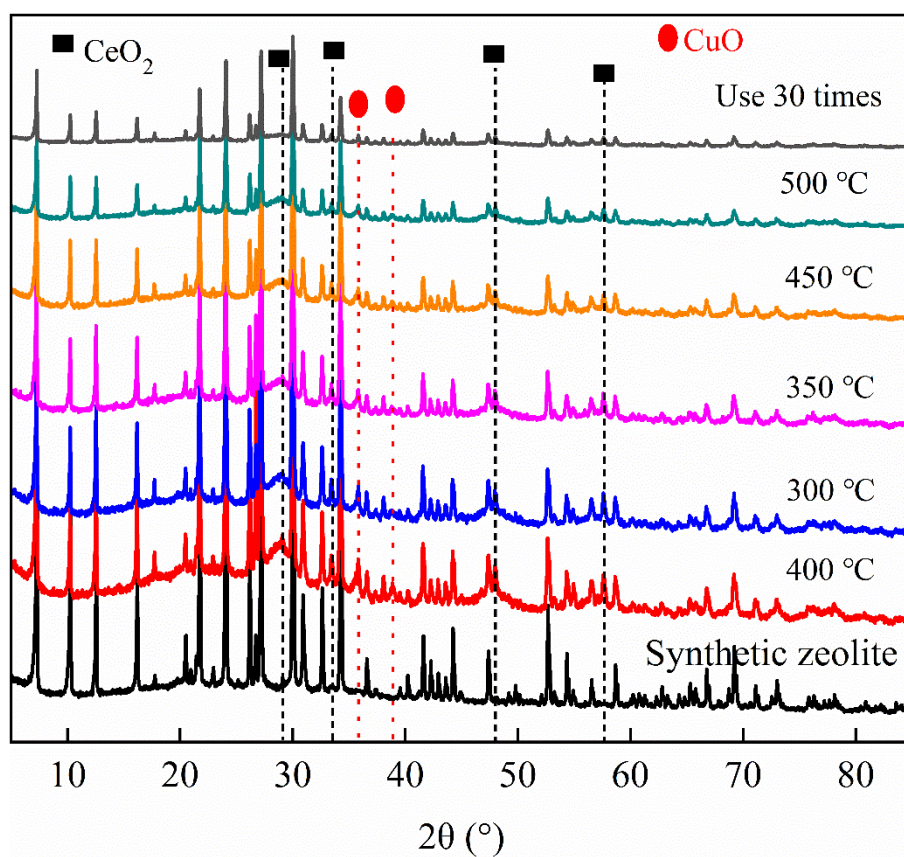

Figure S5 XRD characterization of Cu-Ce@Az catalysts

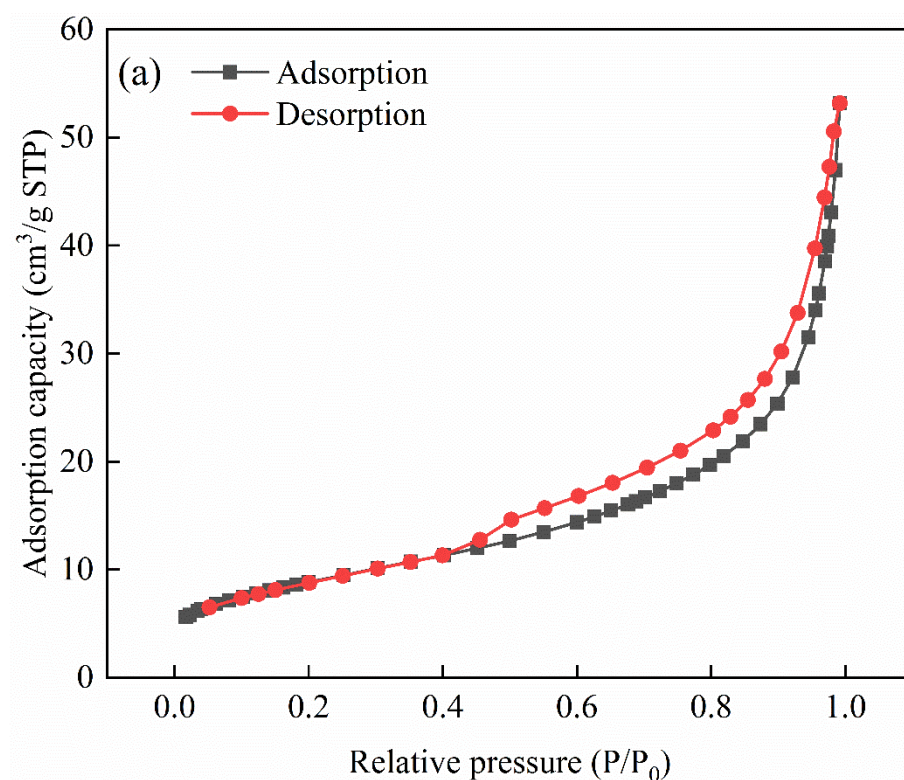

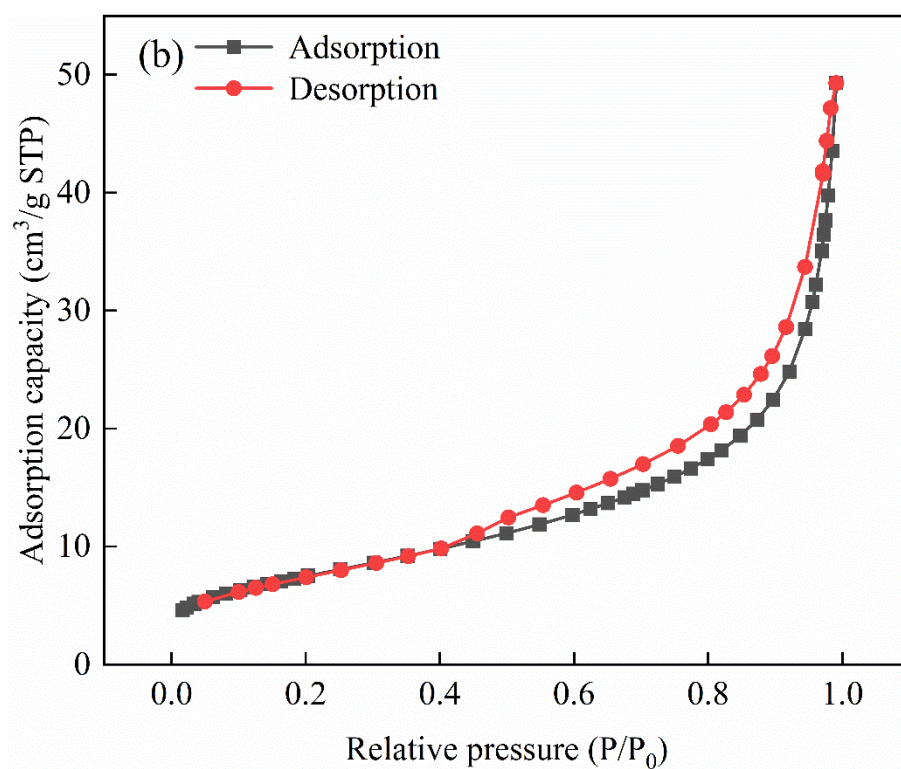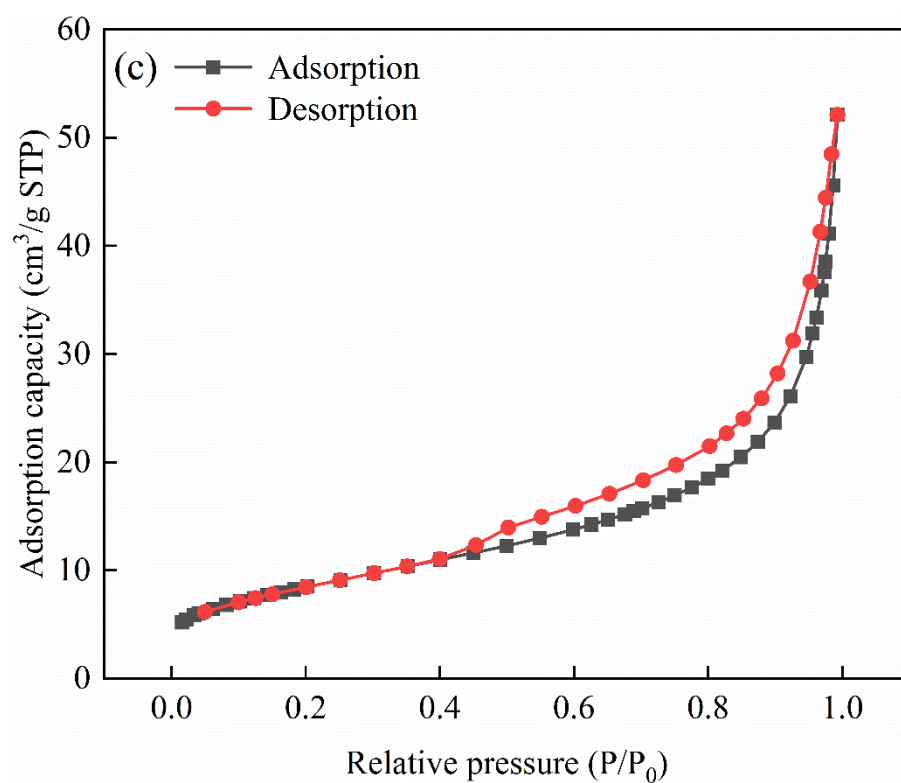

Figure S6 Adsorption and desorption isotherms: (a) Synthetic zeolite, (b) Cu-Ce@Az catalyst, (c) Cu-Ce@Az after utilization 30 times

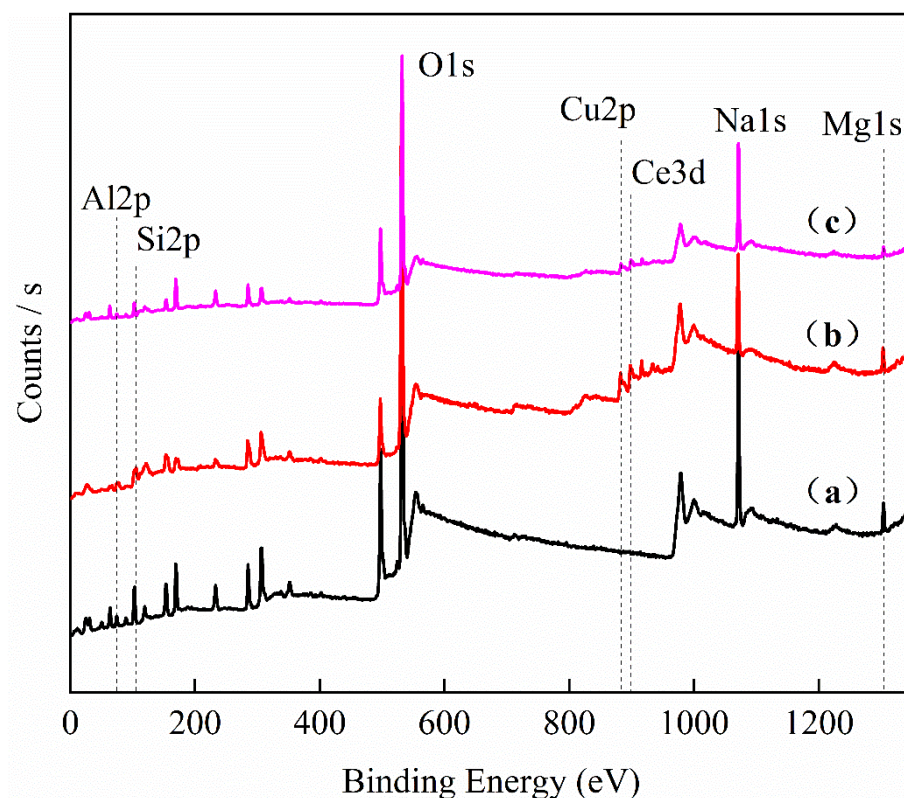

Figure S7 XPS characterization: (a) Synthetic zeolite, (b) Cu-Ce@Az catalyst, (c) Cu-Ce@Az after utilization 30 times

Table S1 BET characterization analysis of Cu-Ce@Az catalyst

| Sample                              | Specific surface area | Average pore volume   | Average pore size |
|-------------------------------------|-----------------------|-----------------------|-------------------|
|                                     | (m <sup>2</sup> /g)   | (cm <sup>3</sup> /g)  | (nm)              |
| Synthetic zeolite                   | 26.85                 | 7.14×10 <sup>-3</sup> | 11.21             |
| Cu-Ce@Az                            | 31.66                 | 8.63×10 <sup>-3</sup> | 11.03             |
| Cu-Ce@Az after utilization 30 times | 30.33                 | 8.01×10 <sup>-3</sup> | 10.94             |

Table S2 XRF characterization of Cu-Ce@Az catalyst

| Oxide                                   | Na <sub>2</sub> O | MgO    | Al <sub>2</sub> O <sub>3</sub> | SiO <sub>2</sub> | CaO    | Fe <sub>2</sub> O <sub>3</sub> | CuO    | CeO <sub>2</sub> |
|-----------------------------------------|-------------------|--------|--------------------------------|------------------|--------|--------------------------------|--------|------------------|
| Synthetic zeolite (%)                   | 15.675            | 2.5766 | 32.9294                        | 44.8477          | 2.1036 | 1.0587                         | /      | /                |
| Cu-Ce@Az (%)                            | 12.6099           | 2.2925 | 30.9237                        | 41.6849          | 2.0324 | 1.1404                         | 1.8941 | 6.6818           |
| Cu-Ce@Az after utilization 30 times (%) | 13.9759           | 2.24   | 31.1067                        | 41.5445          | 2.0714 | 1.1592                         | 1.7673 | 6.5275           |

Table S3 EDS characterization of Cu-Ce@Az catalyst

| Sample  | Synthetic zeolite        |                          | Cu-Ce@Az                 |                          | Cu-Ce@Az after<br>utilization 30 times |                          |
|---------|--------------------------|--------------------------|--------------------------|--------------------------|----------------------------------------|--------------------------|
| Element | Weight<br>percentage (%) | Atomic<br>percentage (%) | Weight<br>percentage (%) | Atomic<br>percentage (%) | Weight<br>percentage (%)               | Atomic<br>percentage (%) |
| O K     | 62.50                    | 74.65                    | 58.69                    | 72.83                    | 59.81                                  | 73.73                    |
| AlK     | 16.15                    | 11.44                    | 16.57                    | 12.19                    | 16.08                                  | 11.75                    |
| SiK     | 19.83                    | 13.49                    | 19.54                    | 13.81                    | 19.39                                  | 13.62                    |
| CeL     | /                        | /                        | 2.68                     | 0.79                     | 2.33                                   | 0.74                     |
| CuK     | /                        | /                        | 2.52                     | 0.38                     | 2.39                                   | 0.34                     |
